# Supplementary material for: Classification of likely functional class for ligand binding sites identified from fragment screening
Source: PubMed Central journal article supplement (PMC10937669; doi:10.1038/s42003-024-05970-8), 2024-03-13
Supplement: 42003_2024_5970_MOESM2_ESM.pdf [file 42003_2024_5970_MOESM2_ESM.pdf]

# Classification of likely functional class for ligand binding sites identified from fragment screening

## Supplementary Information

**Javier S. Utgés, Stuart A. MacGowan, Callum M. Ives<sup>1</sup>**

**and Geoffrey J. Barton\***

Division of Computational Biology, School of Life Sciences,

University of Dundee, Scotland, UK

\*Correspondence to: [gjbarton@dundee.ac.uk](mailto:gjbarton@dundee.ac.uk)

<sup>1</sup>. Present address: Department of Chemistry and Hamilton Institute, Maynooth University,

Maynooth, Ireland. [callum.ives@mu.ie](mailto:callum.ives@mu.ie)

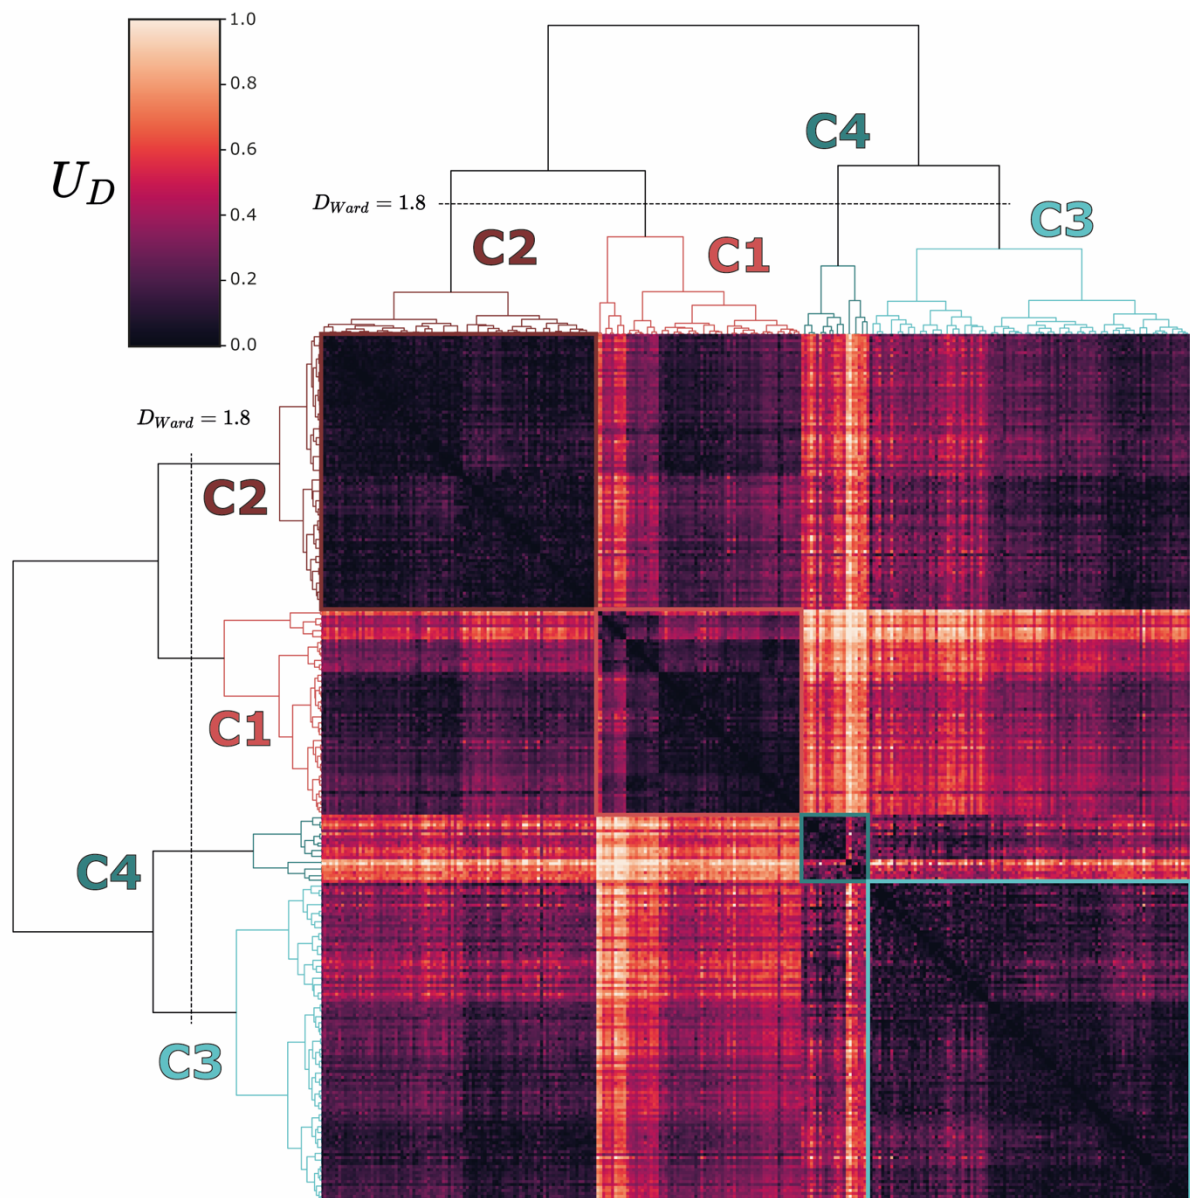

Supplementary Figure 1. Heat map of the U distance,  $U_D$ , matrix of the 293 defined binding sites clustered by the Ward hierarchical clustering method [1] implemented in SciPy [2]. The tree is cut at  $D_{Ward} = 1.8$ , giving four clear clusters. These clusters are labelled so they correspond to the ones obtained with K-means [3]. Clusters in the heatmap are represented by dark squares around the diagonal.  $U_D$  is a distance; therefore, clusters include sites that are similar to each other, and present lower distances (dark colour).

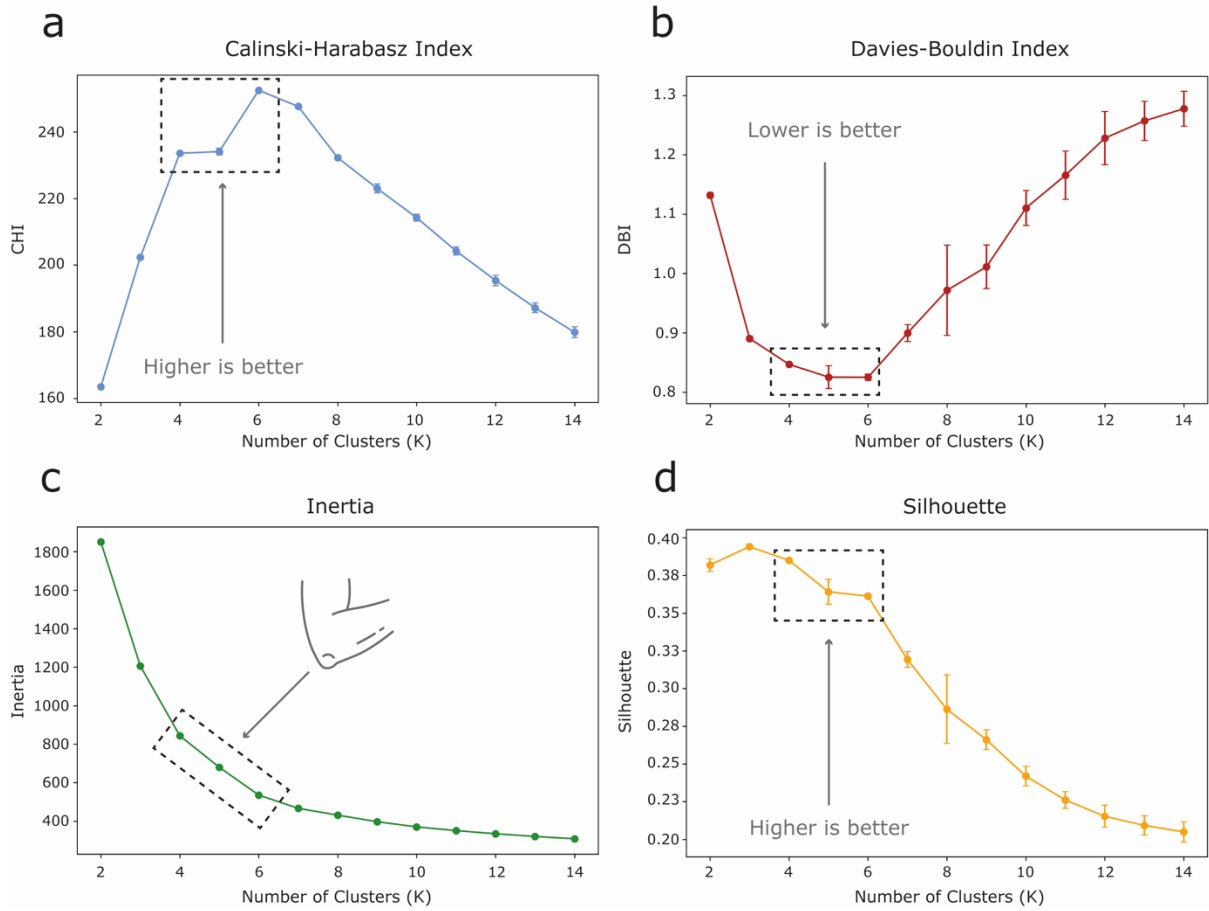

Supplementary Figure 2. Cluster analysis to assess the quality of the K-means clustering. For each  $K \in [2, 14]$ , clustering is bootstrapped 1,000 times with different initial random states. Error bars indicate 1 SD. (A) Calinski-Harabasz Index (CHI) [4]; (B) Davies-Bouldin Index (DBI) [5]; (C) Inertia [6]; (D) Silhouette [7]. All methods agree the optimal clustering of this dataset lies in  $K \in [4, 6]$ .

## Supplementary Note 1: MLP ablation studies

A thorough hyperparameter optimisation was carried out by examining the effect that a series of hyperparameter changes have on the prediction accuracy relative to our current ML setup, labelled as **current**. Sixty-four single-hyperparameter changes were performed, one at a time. For each variation, 100 models were trained with different seeds and the average validation accuracies compared to our current multilayer perceptron (MLP). Sixty-four pairwise t-tests were conducted to compare the accuracy means, and Benjamini-Hochberg correction [8] applied. FDR and  $\Delta_{\text{acc}} = \text{acc}_{\text{VARIANT}} - \text{acc}_{\text{CURRENT}}$  are used to describe the results, where  $\text{acc}_{\text{CURRENT}}$  is the average validation accuracy of our current ML setup across the 100 seeds, and  $\text{acc}_{\text{VARIANT}}$  is the average accuracy across 100 seeds of each one of the 64 variant models.

$\Delta_{\text{acc}} < 0$  will represent a decrease in performance respect our current ML architecture, whereas  $\Delta_{\text{acc}} > 0$  will mean a higher accuracy.

The results of these analyses are described below and graphically represented in Supplementary Figure 3 and Supplementary Table 1.

Removing the single hidden layer resulted in a significant decrease in accuracy,  $\Delta_{\text{acc}} = -11\%$  (FDR < 0.05).

The addition of more layers did not improve accuracy: 2-layer  $\Delta_{\text{acc}} = -1\%$  (FDR < 0.05), 10-layer  $\Delta_{\text{acc}} = -8.9\%$  (FDR < 0.05), or was not statistically different from our current setup baseline: 5-layer  $\Delta_{\text{acc}} = -0.15\%$  (FDR = 0.42).

The addition of neurons  $N_{\text{neurons}} = [11, 20, 25, 50, 100]$  in the single layer did not improve the current accuracy (FDR > 0.05).

The removal of neurons did not have an effect of performance  $N_{\text{neurons}} = [4, 5, 6, 7, 8, 9]$  (FDR > 0.05), or a significant negative effect for 1 neuron,  $\Delta_{\text{acc}} = -15\%$  (FDR < 0.05), 2 neurons  $\Delta_{\text{acc}} = -4\%$  (FDR < 0.05), and 3 neurons,  $\Delta_{\text{acc}} = -1\%$  (FDR < 0.05).

This result suggests that 5 neurons on a single hidden layer might be enough to achieve a comparable accuracy to our current model.

The usage of different activation functions either negatively affected the accuracy of the MLP ( $\Delta_{\text{acc}} < 0$ ) or had no effect ( $\text{FDR} > 0.05$ ).

Most weight initialisers were tested and either negatively affected the accuracy of the MLP ( $\Delta_{\text{acc}} < 0$ ) or had no effect ( $\text{FDR} > 0.05$ ). However, RandomNormal, RandomUniform, and TruncatedNormal did improve the accuracy but by less than 1%,  $\Delta_{\text{acc}} < +1\%$ , ( $\text{FDR} < 0.05$ ).

Regarding dropout rates, a rate = 75%, negatively affected prediction  $\Delta_{\text{acc}} < -2\%$ , ( $\text{FDR} < 0.05$ ). Lower dropout rates: 0.1, 0.25, and 0.33 did improve the accuracy, but the effect size is very small,  $\Delta_{\text{acc}} < +1\%$ , ( $\text{FDR} < 0.05$ ).

This result agrees with the effect of the removal of neurons per layer and shows that fewer neurons on a single hidden layer might be enough to achieve a comparable accuracy to our current model, as dropping them out has no effect.

Different loss functions resulted in terrible loss of accuracy  $\Delta_{\text{acc}} \approx -50\%$ , ( $\text{FDR} < 0.05$ ). This is expected as they are not appropriate for a multi-label classifier, unlike sparse categorical cross entropy.

Regarding optimisers, they either severely negatively affected accuracy  $\Delta_{\text{acc}} \approx -30\%$ , ( $\text{FDR} < 0.05$ ), had no significant effect ( $\text{FDR} > 0.05$ ), or very slightly improved accuracy, such as RMSProp  $\Delta_{\text{acc}} < +1\%$ , ( $\text{FDR} < 0.05$ ).

Extreme learning rates of 0.001 (too small), and 1.0 (too big) negatively affected prediction  $\Delta_{\text{acc}} < -5\%$ , ( $\text{FDR} < 0.05$ ). Intermediate rates had either no significant effect ( $\text{FDR} < 0.05$ ) nor relevant  $|\Delta_{\text{acc}}| < 1\%$ .

Overall, implementing kernel, bias, or activity regularisation techniques did not improve prediction accuracy, but worsened it  $\Delta_{\text{acc}} \in [-2.56, -0.46]$ , ( $\text{FDR} < 0.05$ ).

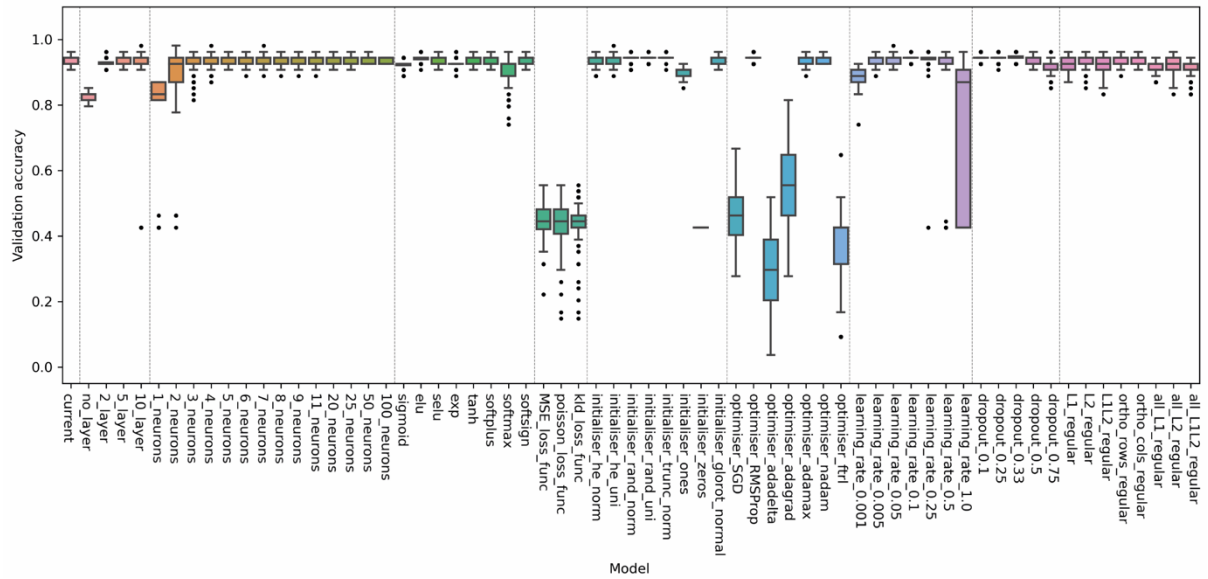

Supplementary Figure 3. Ablation study performed on the MLP. Sixty-four single hyperparameter changes are conducted one at a time to explore the hyperparameter space and the effect they have on the prediction accuracy relative to our current ML setup, labelled as *current*. Box and whiskers represent the distribution of validation accuracies across 100 random seeds. Dashed lines mark the separation between different hyperparameters: number of layers, neurons, activation, loss functions, weight initialisers, optimisers, learning, dropout rates, and regularisation techniques.

| Model                    | Validation accuracy | $\Delta_{acc}$ | FDR         |
|--------------------------|---------------------|----------------|-------------|
| <b>CURRENT</b>           | <b>0.94</b>         | -              | -           |
| <b>no_layer</b>          | <b>0.83</b>         | <b>-11.00</b>  | <b>0.00</b> |
| <b>2_layer</b>           | <b>0.93</b>         | <b>-1.00</b>   | <b>0.00</b> |
| 5_layer                  | 0.94                | -0.15          | 0.42        |
| <b>10_layer</b>          | <b>0.85</b>         | <b>-8.93</b>   | <b>0.00</b> |
| <b>1_neurons</b>         | <b>0.79</b>         | <b>-14.93</b>  | <b>0.00</b> |
| <b>2_neurons</b>         | <b>0.90</b>         | <b>-4.15</b>   | <b>0.00</b> |
| <b>3_neurons</b>         | <b>0.93</b>         | <b>-1.06</b>   | <b>0.00</b> |
| 4_neurons                | 0.94                | -0.28          | 0.24        |
| 5_neurons                | 0.94                | -0.13          | 0.54        |
| 6_neurons                | 0.94                | -0.24          | 0.26        |
| 7_neurons                | 0.94                | -0.39          | 0.08        |
| 8_neurons                | 0.94                | -0.39          | 0.08        |
| 9_neurons                | 0.94                | -0.15          | 0.49        |
| 11_neurons               | 0.94                | 0.09           | 0.65        |
| 20_neurons               | 0.94                | 0.07           | 0.68        |
| 25_neurons               | 0.94                | -0.04          | 0.83        |
| 50_neurons               | 0.94                | -0.02          | 0.91        |
| 100_neurons              | 0.94                | -0.11          | 0.49        |
| <b>sigmoid</b>           | <b>0.92</b>         | <b>-1.52</b>   | <b>0.00</b> |
| elu                      | 0.94                | 0.15           | 0.38        |
| selu                     | 0.94                | -0.26          | 0.15        |
| <b>exp</b>               | <b>0.93</b>         | <b>-1.17</b>   | <b>0.00</b> |
| tanh                     | 0.94                | -0.15          | 0.41        |
| softplus                 | 0.93                | <b>-0.69</b>   | 0.00        |
| <b>softmax</b>           | <b>0.90</b>         | <b>-3.98</b>   | <b>0.00</b> |
| softsign                 | 0.94                | <b>-0.41</b>   | 0.02        |
| <b>MSE_loss_func</b>     | <b>0.44</b>         | <b>-49.81</b>  | <b>0.00</b> |
| <b>poisson_loss_func</b> | <b>0.44</b>         | <b>-50.31</b>  | <b>0.00</b> |
| <b>kld_loss_func</b>     | <b>0.44</b>         | <b>-50.00</b>  | <b>0.00</b> |
| initialiser_he_norm      | 0.94                | -0.20          | 0.37        |

|                            |             |               |             |
|----------------------------|-------------|---------------|-------------|
| initialiser_he_uni         | 0.94        | -0.26         | 0.21        |
| initialiser_rand_norm      | 0.94        | 0.41          | 0.02        |
| initialiser_rand_uni       | 0.94        | 0.44          | 0.01        |
| initialiser_trunc_norm     | 0.95        | 0.59          | 0.00        |
| <b>initialiser_ones</b>    | <b>0.90</b> | <b>-3.96</b>  | <b>0.00</b> |
| <b>initialiser_zeros</b>   | 0.43        | <b>-51.35</b> | <b>0.00</b> |
| initialiser_glorot_normal  | 0.94        | -0.06         | 0.79        |
| <b>optimiser_SGD</b>       | 0.47        | <b>-47.26</b> | <b>0.00</b> |
| optimiser_RMSProp          | 0.95        | 0.54          | 0.00        |
| <b>optimiser_adadelta</b>  | 0.29        | <b>-64.50</b> | <b>0.00</b> |
| <b>optimiser_adagrad</b>   | 0.55        | <b>-38.83</b> | <b>0.00</b> |
| optimiser_adamax           | 0.94        | 0.11          | 0.60        |
| optimiser_nadam            | 0.94        | 0.13          | 0.48        |
| <b>optimiser_ftrl</b>      | 0.35        | <b>-59.24</b> | <b>0.00</b> |
| <b>learning_rate_0.001</b> | <b>0.89</b> | <b>-4.98</b>  | <b>0.00</b> |
| learning_rate_0.005        | 0.94        | -0.44         | 0.04        |
| learning_rate_0.05         | 0.94        | -0.33         | 0.06        |
| learning_rate_0.1          | 0.94        | 0.31          | 0.05        |
| learning_rate_0.25         | 0.93        | -0.83         | 0.27        |
| <b>learning_rate_0.5</b>   | <b>0.88</b> | <b>-5.70</b>  | <b>0.00</b> |
| <b>learning_rate_1.0</b>   | 0.70        | <b>-24.37</b> | <b>0.00</b> |
| dropout_0.1                | 0.95        | 0.56          | 0.00        |
| dropout_0.25               | 0.95        | 0.61          | 0.00        |
| dropout_0.33               | 0.95        | 0.80          | 0.00        |
| dropout_0.5                | 0.94        | 0.11          | 0.54        |
| <b>dropout_0.75</b>        | <b>0.92</b> | <b>-2.02</b>  | <b>0.00</b> |
| <b>L1_regular</b>          | <b>0.93</b> | <b>-1.48</b>  | <b>0.00</b> |
| L2_regular                 | 0.94        | -0.46         | 0.04        |
| <b>L1L2_regular</b>        | <b>0.92</b> | <b>-1.93</b>  | <b>0.00</b> |
| ortho_rows_regular         | 0.94        | -0.46         | 0.02        |
| ortho_cols_regular         | 0.94        | -0.09         | 0.62        |
| <b>all_L1_regular</b>      | <b>0.92</b> | <b>-2.11</b>  | <b>0.00</b> |



|                         |             |              |             |
|-------------------------|-------------|--------------|-------------|
| <b>all_L2_regular</b>   | <b>0.92</b> | <b>-1.70</b> | <b>0.00</b> |
| <b>all_L1L2_regular</b> | <b>0.91</b> | <b>-2.56</b> | <b>0.00</b> |

Supplementary Table 1. Ablation study performed on the MLP. Sixty-four single hyperparameter changes are conducted one at a time to explore the hyperparameter space and the effect they have on the prediction accuracy relative to our current ML setup, labelled as *CURRENT*. Validation accuracy represents the validation accuracy average across 100 random seeds.  $\Delta_{\text{acc}}$  represents the difference in performance between the variant MLP model and our current setup. Negative values result from a decrease in performance, whereas positive ones mean an improvement in classification accuracy. FDR was employed to assess the significance of these differences. Rows are coloured in green when  $\Delta_{\text{acc}} > 0$ , orange when  $-5 < \Delta_{\text{acc}} < 0$ , and red if  $\Delta_{\text{acc}} \leq -5$ . Rows where  $|\Delta_{\text{acc}}| \geq 1$  are in bold font.

a

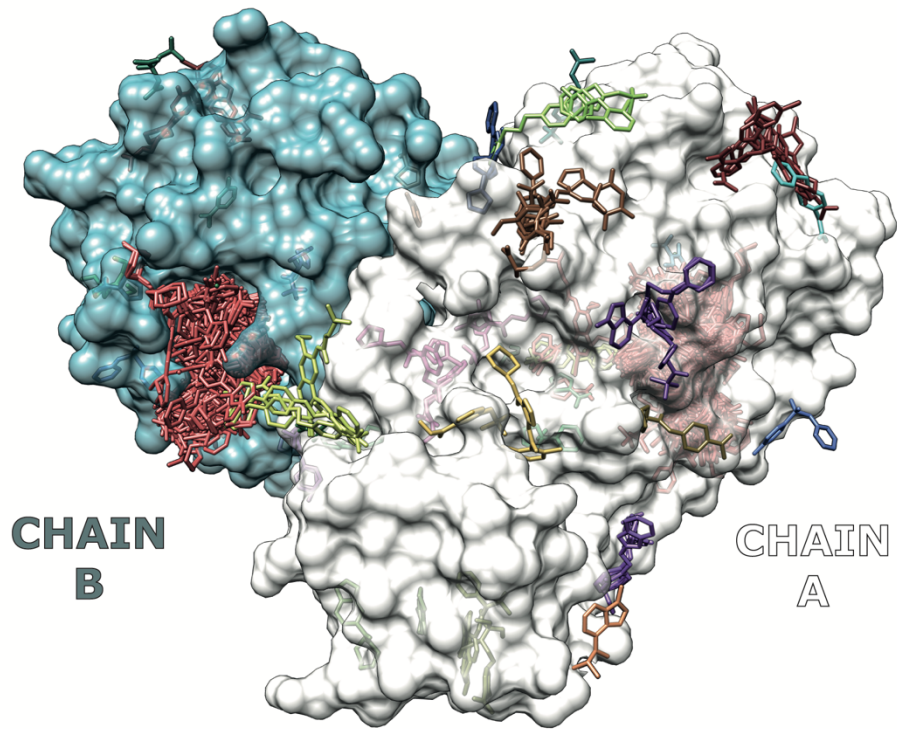

b

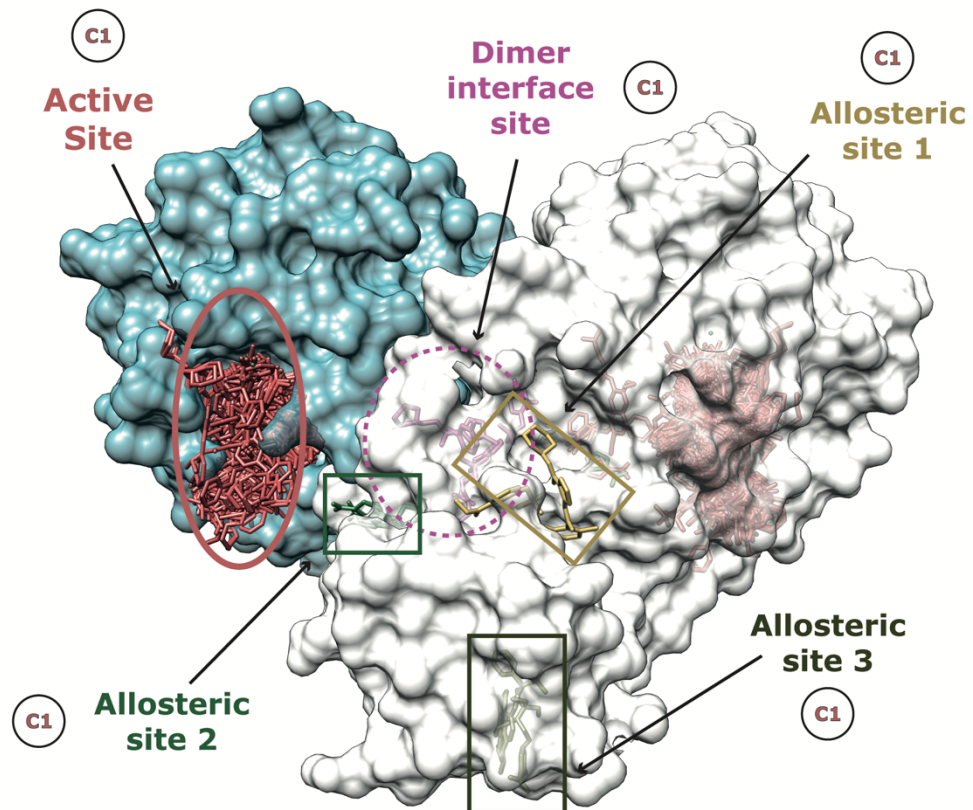

Supplementary Figure 4. (A) Twenty-five defined ligand binding sites on the SARS-CoV-2 main protease, MPro (P0DTD1) from 971 ligands from 511 structures; (B) Five of the 9 C1 sites included the known MPro active site, and four known potential allosteric sites [9, 10].

| <b>C1 site functional predictions supported by literature but not annotated in UniProt</b> |      |                      |       |      |            |           |                                                                                                           |                                                        |
|--------------------------------------------------------------------------------------------|------|----------------------|-------|------|------------|-----------|-----------------------------------------------------------------------------------------------------------|--------------------------------------------------------|
| UniProt ID                                                                                 | RSA  | N <sub>Shenkin</sub> | MES   | p    | # residues | # ligands | UniProt residue numbers                                                                                   | Literature support                                     |
| Q32ZE1                                                                                     | 17.4 | 38.4                 | -0.21 | 0.02 | 10         | 1         | [1762, 1763, 1765, 1766, 1769, 1791, 1991, 2034, 2035, 2038]                                              | RNA binding [11]<br>RNA exit site [12]<br>D3 site [13] |
| Q9Y2J2                                                                                     | 14.6 | 38.2                 | 0.01  | 0.84 | 15         | 1         | [117, 118, 119, 203, 206, 207, 210, 231, 232, 235, 236, 253, 282, 283, 286]                               | GPC binding [14]                                       |
| Q9Y2J2                                                                                     | 13.4 | 43.3                 | 0.02  | 0.7  | 21         | 4         | [154, 161, 162, 163, 164, 185, 186, 189, 208, 212, 217, 295, 297, 298, 299, 300, 301, 315, 375, 376, 379] | Calmodulin binding<br>[14]                             |
| Q8WS26                                                                                     | 16.2 | 28.9                 | -0.22 | 0.26 | 19         | 2         | [105, 106, 107, 108, 109, 112, 151, 154, 155, 158, 159, 162, 170, 171, 173, 174, 175, 176, 179]           | IPP, DMAPP binding<br>[15, 16]                         |
| Q8WS26                                                                                     | 22.1 | 31                   | 0.18  | 0.58 | 8          | 2         | [308, 312, 315, 316, 320, 324, 384, 423]                                                                  | IPP binding [16]                                       |
| P18031                                                                                     | 20.8 | 33.9                 | 0.05  | 0.48 | 14         | 1         | [1, 2, 3, 4, 6, 10, 19, 242, 243, 244, 245, 246, 247, 271]                                                | Conformational change<br>[17]<br>Cluster II [18]       |
| P47811                                                                                     | 17.1 | 55                   | 0.08  | 0    | 19         | 10        | [191, 192, 197, 198, 232, 236, 242, 246, 249, 250, 251, 252, 255, 259, 291, 292, 293, 294, 296]           | MAP insert motif,<br>Trp197 pocket [19, 20]            |

| Q6B0I6                                         | 15.8 | 41.8                 | 0.12  | 0.43 | 12         | 5         | [193, 224, 225, 227, 228, 239, 240, 241, 242, 243, 277, 279]                               | Cryptic binding site [21]                                        |
|------------------------------------------------|------|----------------------|-------|------|------------|-----------|--------------------------------------------------------------------------------------------|------------------------------------------------------------------|
| P0DTD1                                         | 12.9 | 34.3                 | -0.13 | 0.45 | 12         | 2         | [5501, 5503, 5809, 5810, 5811, 5838, 5839, 5840, 5841, 5856, 5858, 5878]                   | RNA binding [22]                                                 |
| P0DTD1                                         | 22.3 | 51.5                 | -0.04 | 0.87 | 9          | 1         | [5806, 5809, 5810, 5811, 5839, 5874, 5876, 5878, 5879]                                     | RNA binding [22]                                                 |
| P22557                                         | 16   | 47.8                 | -0.09 | 0.61 | 16         | 10        | [148, 152, 155, 267, 268, 271, 272, 409, 413, 506, 570, 572, 573, 574, 575, 576]           | Dimerisation interface [23]                                      |
| P22557                                         | 12.7 | 53.1                 | 0.08  | 0.61 | 7          | 2         | [271, 293, 294, 295, 296, 297, 575]                                                        | Conformational change, PLP binding, succinyl-CoA inhibition [23] |
| <b>Novel C1 cluster functional predictions</b> |      |                      |       |      |            |           |                                                                                            |                                                                  |
| UniProt ID                                     | RSA  | N <sub>Shenkin</sub> | MES   | p    | # residues | # ligands | UniProt residue numbers                                                                    | Literature support                                               |
| Q5T0W9                                         | 22.4 | 36.2                 | -0.24 | 0.08 | 12         | 10        | [149, 150, 151, 177, 233, 234, 235, 236, 270, 273, 274, 277]                               | –                                                                |
| Q5T0W9                                         | 9.7  | 38.6                 | -0.05 | 0.79 | 12         | 2         | [125, 126, 127, 129, 229, 255, 256, 257, 272, 275, 276, 279]                               | –                                                                |
| Q8WVM7                                         | 19.8 | 57.7                 | -0.23 | 0.62 | 5          | 1         | [285, 288, 322, 325, 326]                                                                  | –                                                                |
| Q15047                                         | 18.1 | 12.4                 | 0.08  | 0.78 | 18         | 2         | [295, 296, 297, 298, 300, 301, 302, 324, 328, 329, 330, 332, 333, 357, 389, 392, 393, 394] | –                                                                |

|        |      |      |       |      |    |    |                                                                                                      |   |
|--------|------|------|-------|------|----|----|------------------------------------------------------------------------------------------------------|---|
| Q8WS26 | 19.5 | 57.3 | -0.11 | 0.57 | 21 | 26 | [84, 87, 88, 89, 90, 214, 217, 218, 221, 222, 225, 268, 269, 273, 277, 281, 285, 290, 295, 299, 303] | - |
| Q9UGL1 | 28.7 | 31.3 | -0.09 | 0.66 | 10 | 1  | [53, 57, 506, 582, 583, 606, 607, 609, 610, 613]                                                     | - |
| Q9UGL1 | 16.6 | 34   | -0.01 | 1    | 12 | 3  | [658, 659, 662, 663, 666, 667, 670, 701, 736, 737, 738, 741]                                         | - |
| P15379 | 18.3 | 19.4 | 0.09  | 0.63 | 11 | 1  | [23, 24, 40, 41, 50, 146, 148, 162, 163, 164, 165]                                                   | - |
| Q9UJM8 | 24.3 | 42.8 | -0.11 | 0.86 | 6  | 1  | [5, 11, 323, 327, 328, 331]                                                                          | - |
| Q6B0I6 | 21.9 | 36.6 | -0.15 | 0.68 | 4  | 1  | [50, 209, 265, 285]                                                                                  | - |
| Q6B0I6 | 12.2 | 26   | -0.06 | 0.84 | 7  | 1  | [44, 199, 275, 276, 297, 300, 303]                                                                   | - |
| Q9UKK9 | 9.8  | 29.6 | -0.05 | 0.73 | 15 | 1  | [65, 66, 67, 69, 75, 77, 124, 125, 145, 146, 147, 175, 200, 205, 206]                                | - |
| Q92835 | 16.5 | 33.7 | -0.05 | 0.78 | 19 | 46 | [615, 616, 617, 618, 620, 621, 622, 624, 625, 630, 631, 632, 633, 634, 635, 636, 637, 638, 674]      | - |
| Q92835 | 12.2 | 39.4 | 0.02  | 0.92 | 12 | 1  | [560, 561, 562, 570, 571, 572, 573, 574, 578, 817, 839, 840]                                         | - |
| Q96HY7 | 11.6 | 38.5 | 0.07  | 0.75 | 14 | 1  | [57, 58, 60, 61, 64, 105, 106, 107, 121, 122, 125, 126, 147, 151]                                    | - |

|        |      |      |       |      |    |   |                                                                                            |   |
|--------|------|------|-------|------|----|---|--------------------------------------------------------------------------------------------|---|
| P22557 | 17.5 | 40.6 | 0.04  | 0.72 | 16 | 7 | [143, 145, 146, 149, 348, 349, 350, 351, 352, 353, 380, 381, 383, 402, 403, 406]           | – |
| P24821 | 14.2 | 24.4 | –0.29 | 0    | 15 | 8 | [2010, 2011, 2012, 2025, 2045, 2046, 2047, 2048, 2049, 2050, 2054, 2055, 2056, 2057, 2060] | – |

Supplementary Table 2. Twenty-nine RSA C1 ligand binding sites unannotated in UniProt, therefore classified as unknown function (UF). UniProt ID indicates the protein's UniProt accession. RSA is the median site RSA.  $N_{\text{SHENKIN}}$  is the average normalised Shenkin score for the site. MES is the average missense enrichment score for the site. p is the p-value associated to this site MES. # residues is the number of residues forming the site. # ligands is the number of ligands binding to the site. UniProt residue numbers is a list of the UniProt residue numbers of the residues forming the site. Literature support contains a brief description of the site function and adequate references for the 12 sites (top) supported by the literature. The other 17 sites (bottom) represent novel predictions of functional sites.

## Supplementary References

1. Ward, J.H., *Hierarchical Grouping to Optimize an Objective Function*. Journal of the American Statistical Association, 1963. **58**(301): p. 236-244.
2. Virtanen, P., et al., *SciPy 1.0: fundamental algorithms for scientific computing in Python*. Nat Methods, 2020. **17**(3): p. 261-272.
3. Lloyd, S., *Least squares quantization in PCM*. IEEE Transactions on Information Theory, 1982. **28**(2): p. 129-137.
4. Caliński, T. and J. Harabasz, *A dendrite method for cluster analysis*. Communications in Statistics, 1974. **3**(1): p. 1-27.
5. Davies, D.L. and D.W. Bouldin, *A Cluster Separation Measure*. IEEE Transactions on Pattern Analysis and Machine Intelligence, 1979. **PAMI-1**(2): p. 224-227.
6. Thorndike, R.L., *Who belongs in the family?* Psychometrika, 1953. **18**(4): p. 267-276.
7. Rousseeuw, P.J., *Silhouettes: A graphical aid to the interpretation and validation of cluster analysis*. Journal of Computational and Applied Mathematics, 1987. **20**: p. 53-65.
8. Benjamini, Y. and Y. Hochberg, *Controlling the False Discovery Rate: A Practical and Powerful Approach to Multiple Testing*. Journal of the Royal Statistical Society. Series B (Methodological), 1995. **57**(1): p. 289-300.
9. Douangamath, A., et al., *Crystallographic and electrophilic fragment screening of the SARS-CoV-2 main protease*. Nat Commun, 2020. **11**(1): p. 5047.
10. DasGupta, D., W.K.B. Chan, and H.A. Carlson, *Computational Identification of Possible Allosteric Sites and Modulators of the SARS-CoV-2 Main Protease*. J Chem Inf Model, 2022. **62**(3): p. 618-626.
11. Durgam, L. and L. Guruprasad, *Molecular mechanism of ATP and RNA binding to Zika virus NS3 helicase and identification of repurposed drugs using molecular dynamics simulations*. J Biomol Struct Dyn, 2022. **40**(23): p. 12642-12659.
12. Mottin, M., et al., *Molecular dynamics simulations of Zika virus NS3 helicase: Insights into RNA binding site activity*. Biochem Biophys Res Commun, 2017. **492**(4): p. 643-651.
13. Raubenolt, B.A., K. Wong, and S.W. Rick, *Molecular dynamics simulations of allosteric motions and competitive inhibition of the Zika virus helicase*. J Mol Graph Model, 2021. **108**: p. 108001.

14. Han, B.G., et al., *Protein 4.1R core domain structure and insights into regulation of cytoskeletal organization*. Nat Struct Biol, 2000. **7**(10): p. 871-5.
15. Munzker, L., et al., *Fragment-Based Discovery of Non-bisphosphonate Binders of Trypanosoma brucei Farnesyl Pyrophosphate Synthase*. Chembiochem, 2020. **21**(21): p. 3096-3111.
16. Gabelli, S.B., et al., *Structure and mechanism of the farnesyl diphosphate synthase from Trypanosoma cruzi: implications for drug design*. Proteins, 2006. **62**(1): p. 80-8.
17. Keedy, D.A., et al., *An expanded allosteric network in PTP1B by multitemperature crystallography, fragment screening, and covalent tethering*. Elife, 2018. **7**.
18. Cui, D.S., et al., *Leveraging Reciprocity to Identify and Characterize Unknown Allosteric Sites in Protein Tyrosine Phosphatases*. J Mol Biol, 2017. **429**(15): p. 2360-2372.
19. Francis, D.M., et al., *The differential regulation of p38alpha by the neuronal kinase interaction motif protein tyrosine phosphatases, a detailed molecular study*. Structure, 2013. **21**(9): p. 1612-23.
20. Nichols, C., et al., *Mining the PDB for Tractable Cases Where X-ray Crystallography Combined with Fragment Screens Can Be Used to Systematically Design Protein-Protein Inhibitors: Two Test Cases Illustrated by IL1beta-IL1R and p38alpha-TAB1 Complexes*. J Med Chem, 2020. **63**(14): p. 7559-7568.
21. Pearce, N.M., et al., *Partial-occupancy binders identified by the Pan-Dataset Density Analysis method offer new chemical opportunities and reveal cryptic binding sites*. Struct Dyn, 2017. **4**(3): p. 032104.
22. Newman, J.A., et al., *Structure, mechanism and crystallographic fragment screening of the SARS-CoV-2 NSP13 helicase*. Nat Commun, 2021. **12**(1): p. 4848.
23. Bailey, H.J., et al., *Human aminolevulinate synthase structure reveals a eukaryotic-specific autoinhibitory loop regulating substrate binding and product release*. Nat Commun, 2020. **11**(1): p. 2813.
